# Supplementary material
Source: PubMed Central journal article supplement (PMC3381288)
Supplement: NIHMS381729-supplement-01.pdf [file NIHMS381729-supplement-01.pdf]

N-TERMINAL DOMAIN:

\* \* \*

|             |     |                |                       |                              |
|-------------|-----|----------------|-----------------------|------------------------------|
| RVA SA11    | 172 | IVAST-INK-YGVP | PRHNAKRYEYDVMK-DKPY   | YLVTWANSSIEMLMSVFSHD---DYLI  |
| RVC Bristol | 181 | IIAAT-INK-YGMP | PRHNTRYRYEWETMK-NKPY  | HLAAWINSSIEMIACVVDHH---TYMI  |
| RVD 05V0049 | 170 | YVAST-VSH-YGIP | VHNQKYRYDYKEMY-NKPY   | YLVPWANSSIEMIFAVSSHE---LYLV  |
| RVF 03V0568 | 177 | IVAST-LHH-YGIP | PRHDSKYRYTYEQMR-DKPY  | YIVPWANSAIEMLSVNNHD---DFVI   |
| RVB Bang373 | 216 | IQKCF-SEG-YLEM | SRDRKWNHTLDELN-NSRF   | HLYNAKIIHAACAMISLAHS---DHID  |
| RVB DB176   | 213 | TINQS-YSEGY    | LELSLDRKWSHTIEQLR-KST | FRLYNTKVIHAACAMVSLIHA---SSII |
| RVG 03V0567 | 220 | IEG---Y---     | LELERNRKSMTIKELK-EAN  | FRMYNAKIIHAACAMISILHS---KRII |
| RVH B219    | 219 | IIKTNVNG-YLE   | ILPNRKWSHSLADLRENKSI  | MMYSAKIIHASCAMISILHAVP       |
| RVH J19     | 220 | IRTNV-VNG-YLE  | ILPNRKWSHSLADLRENKSI  | MMYSAKIIHASCAMISILHAVP       |

POLYMERASE DOMAIN:

|             |     |       |                    |        |          |        |      |        |        |        |
|-------------|-----|-------|--------------------|--------|----------|--------|------|--------|--------|--------|
| RVA SA11    | 330 | FHVGF | FRKQKMLDAALDQLKTEY | TENVDD | EMYREY   | TMLIR  | DEVV | KMLEE  | PKVHDD | HLLR-D |
| RVC Bristol | 336 | FHVGY | RKQALSDAVYDQITV    | YSDNVN | MEMYKEYS | ERIENE | IF   | TILKDK | IIHED  | KRLE-E |
| RVD 05V0049 | 325 | FHVGY | RKQMLDAVTDQLS      | IEYSD  | TFDKM    | YNMYT  | NNI  | KI     | I      | DDMLR  |
| RVF 03V0568 | 332 | FHVGY | RKQMLQDAVQDQ       | LSVEY  | SENVDK   | TM     | YDEY | NY     | I      | KEDY   |
| RVB Bang373 | 374 | FHVGH | RIDNAQDAITDQV      | TATY   | TS       | DI     | RE   | YD     | NY     | YRL    |
| RVB DB176   | 372 | FHVGH | RIDNAQDAIIDQV      | TAP    | YTTD     | V      | RE   | YD     | I      | Y      |
| RVG 03V0567 | 373 | FHVGH | RIDNSQDAIQDQV      | TVEY   | TTK      | V      | RE   | YD     | M      | Y      |
| RVH B219    | 380 | FHVGH | RIDNPQDAIEAQV      | KVEY   | TS       | D      | V    | K      | E      | Y      |
| RVH J19     | 380 | FHVGH | RIDNPQDAIEAQV      | KVEY   | TS       | D      | V    | K      | E      | Y      |

\* \*

\* \*\*\*

|             |     |     |                |       |       |     |      |       |        |      |     |     |     |    |
|-------------|-----|-----|----------------|-------|-------|-----|------|-------|--------|------|-----|-----|-----|----|
| RVA SA11    | 389 | SEL | AGLLSMSSASNGES | RQLK  | FRKTI | FST | KKNM | HVMDD | MANERY | TPGI | IPP | VNV | DKP | IP |
| RVC Bristol | 395 | YEL | SALLSMSSASNG   | ILRE  | IN    | FG  | GQ   | KVR   | ST     | KKNM | H   | V   | IDD | IY |
| RVD 05V0049 | 384 | AEI | AGLLSMSSASNG   | ESRVI | KFR   | RT  | V    | R     | ST     | KKNM | H   | V   | M   | D  |
| RVF 03V0568 | 391 | HEL | AGLLSMSSASNG   | KMEI  | KFG   | S   | K    | L     | F      | T    | R   | K   | N   | M  |
| RVB Bang373 | 434 | VTA | ESLSALANSSNG   | F     | SKE   | V   | T    | F     | I      | D    | R   | K   | I   | K  |
| RVB DB176   | 432 | VTA | ESLSALANSSNG   | F     | SKE   | V   | L    | F     | I      | D    | R   | K   | I   | K  |
| RVG 03V0567 | 433 | VTV | PSLASLANTSNG   | K     | T     | I   | E    | V     | F      | V    | G   | R   | K   | I  |
| RVH B219    | 440 | VTA | ESLAAMANSNG    | YSR   | S     | V   | T    | F     | I      | D    | R   | E   | I   | K  |
| RVH J19     | 440 | VTA | ESLAAMANSNG    | YSR   | S     | V   | T    | F     | I      | D    | R   | E   | I   | K  |

Motif F

Priming Loop

|             |     |   |   |   |   |   |   |   |   |   |   |   |   |   |   |   |   |   |   |   |   |   |   |   |   |   |   |   |   |   |   |   |   |   |   |   |   |   |   |   |   |   |   |   |   |   |   |   |   |   |   |   |   |   |   |   |   |   |   |   |   |
|-------------|-----|---|---|---|---|---|---|---|---|---|---|---|---|---|---|---|---|---|---|---|---|---|---|---|---|---|---|---|---|---|---|---|---|---|---|---|---|---|---|---|---|---|---|---|---|---|---|---|---|---|---|---|---|---|---|---|---|---|---|---|---|
| RVA SA11    | 449 | L | G | R | R | D | V | P | G | R | R | T | R | I | F | I | L | P | Y | E | F | I | A | Q | H | A | V | E | K | M | L | I | Y | A | K | H | T | R | E | Y | A | E | F | Y | S | Q | S | N | Q | L | L | S | Y | G | D |   |   |   |   |   |   |
| RVC Bristol | 454 | L | G | R | R | D | V | P | G | R | R | T | R | A | I | F | I | L | P | Y | Q | F | I | A | Q | H | S | F | A | E | I | M | L | N | Y | A | K | R | E | R | E | Y | S | E | F | Y | S | Q | A | N | Q | V | L | S | Y | G | D |   |   |   |   |
| RVD 05V0049 | 443 | L | G | R | R | D | V | P | G | R | R | T | R | V | I | F | I | L | P | Y | P | F | I | A | Q | H | S | V | V | E | L | L | R | E | S | K | H | I | K | E | F | S | E | F | Y | S | Q | S | S | Q | L | L | S | Y | G | D |   |   |   |   |   |
| RVF 03V0568 | 451 | L | G | R | R | D | V | P | G | R | R | T | R | V | I | F | I | L | P | Y | E | F | I | A | Q | H | A | I | V | E | L | L | L | K | Q | A | K | H | T | R | E | F | S | E | F | Y | S | S | A | N | Q | L | L | S | Y | G | D |   |   |   |   |
| RVB Bang373 | 491 | M | G | T | R | N | V | P | A | R | Q | T | R | G | I | F | I | L | P | W | Q | V | A | A | I | Q | H | T | I | A | E | S | L | Y | K | R | A | K | K | G | S | Y | Q | G | S | F | A | E | A | Y | T | A | K | T | A | S | L | T | Y | G | V |
| RVB DB176   | 489 | M | G | T | R | N | V | P | A | R | Q | T | R | G | I | F | I | L | P | W | Q | V | A | A | V | Q | H | T | I | A | E | S | L | Y | K | T | A | K | K | G | A | Y | Q | G | S | F | A | E | A | Y | T | A | K | T | A | S | L | T | Y | G | V |
| RVG 03V0567 | 491 | M | G | T | R | N | V | P | A | R | Q | T | R | G | I | F | I | L | P | W | Q | V | A | A | V | Q | H | T | I | A | E | T | M | Y | K | R | A | K | K | G | A | Y | R | G | A | F | A | E | A | Y | T | A | K | A | A | S | L | T | Y | G | V |
| RVH B219    | 498 | M | G | T | R | N | V | P | A | R | Q | T | R | G | I | F | I | L | P | W | Q | V | A | A | I | Q | H | T | I | A | E | F | L | Y | K | K | A | K | K | G | G | F | G | A | T | F | A | E | A | V | S | K | A | A | T | L | T | Y | G | I |   |
| RVH J19     | 498 | M | G | T | R | N | V | P | A | R | Q | T | R | G | I | F | I | L | P | W | Q | V | A | A | I | Q | H | T | I | A | E | F | L | Y | K | K | A | K | K | G | G | F | G | A | T | F | A | E | A | V | A | K | A | A | T | L | T | Y | G | I |   |

Motif A

|             |     |   |   |   |   |   |   |   |   |   |   |   |   |   |   |   |   |   |   |   |   |   |   |   |   |   |   |   |   |   |   |   |   |   |   |   |   |   |   |   |     |     |     |     |   |   |     |     |     |     |   |   |   |   |   |   |   |   |   |   |
|-------------|-----|---|---|---|---|---|---|---|---|---|---|---|---|---|---|---|---|---|---|---|---|---|---|---|---|---|---|---|---|---|---|---|---|---|---|---|---|---|---|---|-----|-----|-----|-----|---|---|-----|-----|-----|-----|---|---|---|---|---|---|---|---|---|---|
| RVA SA11    | 506 | V | T | R | F | L | S | N | N | T | M | V | L | Y | T | D | V | S | Q | W | D | S | Q | H | N | T | Q | F | R | K | G | I | I | M | G | L | D | I | L | A | N   | --- | --- | M   | T | N | D   | --- | --- | A   | K | V | L | Q | T |   |   |   |   |   |
| RVC Bristol | 511 | V | T | R | L | D | S | N | S | I | L | C | F | T | D | V | S | Q | W | D | S | Q | H | N | T | K | V | L | R | R | S | I | I | R | A | M | K | R | L | K | Q   | --- | --- | L   | T | H | N   | --- | --- | I   | N | I | H | K | A |   |   |   |   |   |
| RVD 05V0049 | 500 | T | N | R | Y | L | N | Q | S | T | I | I | V | Y | A | D | V | S | Q | W | D | S | S | K | H | N | T | P | L | R | N | A | I | L | K | A | I | E | Q | L | K   | S   | --- | --- | Y | T | T   | N   | --- | --- | E | K | V | I | T | A |   |   |   |   |
| RVF 03V0568 | 508 | T | M | R | E | L | N | P | S | T | I | I | Y | T | D | V | S | Q | W | D | S | Q | H | N | T | Q | F | R | K | A | I | M | A | M | A | Q | D | L | Q | A | --- | --- | Y   | T   | T | D | --- | --- | Q   | N   | V | E | R | A |   |   |   |   |   |   |
| RVB Bang373 | 551 | L | A | E | D | T | S | K | A | T | K | I | I | L | Y | T | D | V | S | Q | W | D | S | Q | H | N | T | E | P | Y | R | S | A | W | I | N | A | I | R | E | A   | R   | S   | E   | M | K | W   | L   | S   | D   | E | P | I | V | L | N | M | N | V |   |
| RVB DB176   | 549 | L | A | E | D | T | S | K | A | M | K | I | I | L | Y | T | D | V | S | Q | W | D | S | Q | H | N | T | E | P | Y | R | S | A | W | I | N | A | I | K | Y | L   | R   | E   | E   | G | R | W   | L   | K   | E   | N | E | P | R | M | L | G | I | N | V |
| RVG 03V0567 | 551 | L | A | Q | D | T | S | T | A | E | K | I | I | L | Y | T | D | V | S | Q | W | D | S | Q | H | N | T | E | P | Y | R | S | A | W | I | N | A | I | D | E | A   | R   | E   | E   | L | A | M   | P   | R   | S   | L | E | P | K | V | L | E | M | N | V |
| RVH B219    | 558 | L | A | E | A | T | S | K | A | D | Q | L | I | L | Y | T | D | V | S | Q | W | D | S | Q | H | N | T | E | P | Y | R | S | A | W | I | N | A | I | K | E | A   | R   | T   | K   | Y | K | I   | N   | Y   | N   | Q | E | P | V | V | L | G | M | N | V |
| RVH J19     | 558 | L | A | E | A | T | S | K | A | D | Q | L | I | L | Y | T | D | V | S | Q | W | D | S | Q | H | N | T | E | P | Y | R | S | A | W | I | N | A | I | K | E | A   | R   | T   | K   | Y | K | I   | N   | Y   | N   | Q | E | P | V | V | L | G | M | N | V |

\* \* Motif B

|             |     |                                    |                             |
|-------------|-----|------------------------------------|-----------------------------|
| RVA SA11    | 558 | LNLYKQTQINLMDSYVQIPDGNVIK---K-IQY  | GAVASGEKQTKAANSIANLALIKTVLS |
| RVC Bristol | 563 | INIIYIQSQENLENSYVLIDK----K---A-IQY | GATASGEKQTKIMNSIANKALIQTVLG |
| RVD 05V0049 | 552 | LNNYALTQMKLKNSFVTIGN----K---V-LOY  | GAVASGEKQTKLMNSIANLALITTVIN |
| RVF 03V0568 | 560 | LNKYETQRQLMNSYVTIDD----K---I-IQY   | GAVASGEKQTKIANSIANLALIKTVLN |
| RVB Bang373 | 611 | LDSMIKIQEYLLNSNLIVASPGSOR-PLKIIRY  | HGVASGEKTTKIGNSFANVALIETVLD |
| RVB DB176   | 609 | LDAMSSIQESLLNSTLIVTSTRSNRNAL-TIRY  | HGVASGEKTTKVGNSFANVALIETVLD |
| RVG 03V0567 | 611 | LDKMKIEIQKALLNSDLIIESPGSQREPLK-IRY | HGVASGEKTTKIGNSFANVALINTVFN |
| RVH B219    | 618 | LDKMIIEIQEALLNSNLIVESQGSKRQPLR-IKY | HGVASGEKTTKIGNSFANVALITTVFN |
| RVH J19     | 618 | LDKMIIEIQEALLNSNLIVESQGSKRQPLR-IKY | HGVASGEKTTKIGNSFANVALITTVFN |

|             |     |                              |                             |          |
|-------------|-----|------------------------------|-----------------------------|----------|
|             |     | Motif C                      | Motif D                     |          |
| RVA SA11    | 614 | RISNKH-SFATKIIRVDGDDNYAVLQF  | NTEVTKQMIQDVSNDVRETYARMNAVK | KALVST   |
| RVC Bristol | 615 | KLMTDYT-FDVKMIRVDGDDNYAIVRF  | PIAITEKLLSEFTSKLRSYSEMNVKV  | KALASL   |
| RVD 05V0049 | 605 | YLNVGES-YRIKIIIRVDGDDNYFIMEF | DRKVDKQLVTVSNVAKDTYGRMDVKV  | KALTAT   |
| RVF 03V0568 | 612 | KLSAKYT-FNFKLIRVDGDDNYTVIES  | RSQVTQELLSNLSKDIKDTYALMNVK  | KALVST   |
| RVB Bang373 | 670 | SVKQEIPIEIVTHLRVDGDDNVVSLT   | SCQI---S--KLQETVKRAYSKLNARV | KALASY   |
| RVB DB176   | 668 | VTKQQIPDIEITHLRVDGDDNVVSMNT  | --SC--NISKLQSVIKSNYQKLNARV  | KALASY   |
| RVG 03V0567 | 670 | KVAERIPDIRVTHMRVDGDDNVVTMYT  | ---SC--KIEELQKEIKDAYTQMNA   | RVKALASW |
| RVH B219    | 677 | NLTNTMPSIRVNHMRVDGDDNVVTMYT  | ---AN--RIDEVQENIKEKYKRMNA   | KVKALASY |
| RVH J19     | 677 | NLTNTMPSIRVNHMRVDGDDNVVTMYT  | ---AN--RIDEVQENIKEKYKRMNA   | KVKALASY |

|             |     |                               |                           |           |
|-------------|-----|-------------------------------|---------------------------|-----------|
|             |     | Motif E                       | **                        |           |
| RVA SA11    | 673 | VGIEIAKRYIAGGKIFFRAGINLLNNEK  | ---RGQSTQWDQAAILYSNYIVNRL | RGFETD-R  |
| RVC Bristol | 674 | TGCEIAKRYVAGGMLFFRAGVNILHHEK  | ---RNQDSAYDMAATLYANYIVNAL | RGLTMS-R  |
| RVD 05V0049 | 663 | TGLEMAKRYIAGGRLFFRAGVNILNNEK  | ---RHTTTYDQAIIYANYLVNKM   | RGYNME-R  |
| RVF 03V0568 | 671 | TGLEMAKRYIAGGRIYFRAGINILNNEK  | ---RNQQTAWDQAAILYASYTVN   | KLRFITN-R |
| RVB Bang373 | 725 | TGLEMAKRFIVCGKIFERGAIPIFTAERP | YGTDVSIQSMCGSSIYSSA-VNAY  | RGFGDSYF  |
| RVB DB176   | 723 | TGLEMAKRFIICGNIFERGAIPIFTAERP | YGTDVSIQSMGSSIYSSA-VNAY   | RAFGDGYL  |
| RVG 03V0567 | 725 | TGLEMAKRFIICGKIFERGAISIFTAERP | YGTDVSIQSMGASLYSAA-VNAY   | RGFGETYR  |
| RVH B219    | 732 | TGLEMAKRFIICGKIFERGAISIFTAERP | YGTDLVQSTTGSLIYSSA-VNAY   | RGFGDDYL  |
| RVH J19     | 732 | TGLEMAKRFIICGKIFERGAISIFTAERP | YGTDLVQSTTGSLIYSSA-VNAY   | RGFGDNYL  |

|             |     |                                |                         |           |
|-------------|-----|--------------------------------|-------------------------|-----------|
| RVA SA11    | 730 | EFILTKI-MQMTSVAITGSLRIFPSERVL  | --TTNSTFKV----FDEDFIIEY | GTT       |
| RVC Bristol | 731 | TFILTKI-CQMTSIIKITGTLRIFPMKSIL | --ALNSAFKV----FDEVDYVIN | YPIIS     |
| RVD 05V0049 | 720 | IFILCKI-MQMTSVKITGSLRIFPASLML  | --TTNSPYKV----FDDVDFVQ  | TYNSS     |
| RVF 03V0568 | 728 | TFILTKI-MQMTSVKISGVLRIFPASDVL  | --TLNSTYKV----FDEVDYAVN | YKVD      |
| RVB Bang373 | 785 | AFMQDVLVPPSSVRITGRLRVLLSPVTLY  | ATGPLSFEITPQGLGGRCRM    | YTO-SE    |
| RVB DB176   | 783 | DFMMDVLVPPSSTVRLTGRRLRVLLSPIT  | LFATGPLSFEVTQNGLGGR     | CRLYT--KN |
| RVG 03V0567 | 785 | KFMEDVLIPPSASTKITARLRVLLSPITL  | HSIGPLGYEITPGGLGGR      | MR-HFADKI |
| RVH B219    | 792 | NFMTDVLVPPSASVKITGRLRSLLSPVTLY | STGPLSFEITPYGLGGR       | MRLFSLSKE |
| RVH J19     | 792 | NFMTDVLVPPSASVKITGRLRSLLSPVTLY | STGPLSFEITPYGLGGR       | MRLFSLSKE |
